# Supplementary material for: A new method using compressed CO2 for the in situ functionalization of mesoporous silica with hyperbranched polymers
Source: Royal Society of Chemistry journal article supplement (doi:10.1039/c3cc47931e), 2013-01-01
Supplement: c3cc47931e.pdf [file c3cc47931e.pdf]

### Supplementary information

**Manuscript:** Compressed CO<sub>2</sub> as a new method for the in situ functionalization of mesoporous silica with hyperbranched polymers

**Authors:** Pedro López-Aranguren, Lourdes F. Vega and Concepción Domingo

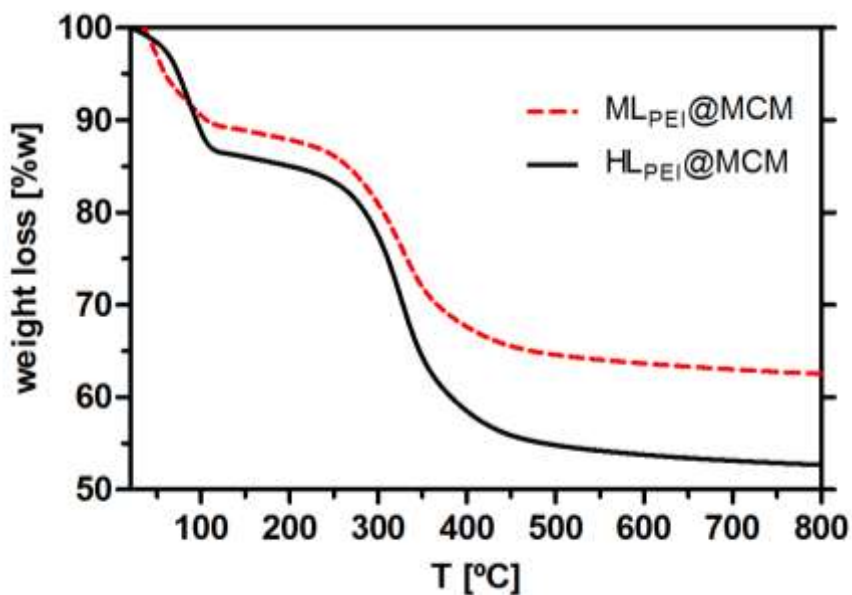

**Figure S1:** TGA curves for ML<sub>PEI</sub>@MCM and HL<sub>PEI</sub>@MCM.

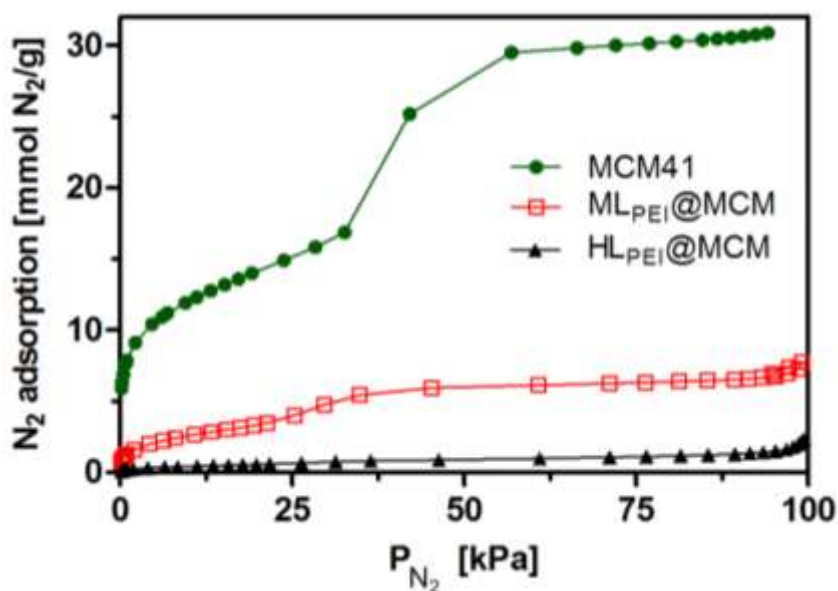

**Figure S2:** N<sub>2</sub> adsorption isotherms for
